# Supplementary material for: Enantiopure and racemic radical-cation salts of bis(2′-hydroxylpropylthio)(ethylenedithio)TTF with polyiodide anions
Source: Royal Society of Chemistry journal article supplement (doi:10.1039/c6dt04645b), 2017-01-01

## Supplementary Information.

### Enantiopure and racemic radical-cation salts of bis(2'-hydroxypropylthio)(ethylenedithio)TTF with polyiodide anions

Lee Martin,<sup>\*a</sup> John D. Wallis,<sup>a</sup> Milena Guziak,<sup>a</sup> Peter Maksymiw,<sup>a</sup> Florence Konalian-Kempf,<sup>a</sup> Anthony Christian,<sup>a</sup> Shin'ichi Nakatsuji,<sup>b</sup> Jun'ichi Yamada<sup>b</sup> and Hiroki Akutsu<sup>b,c</sup>

<sup>a</sup> School of Science and Technology, Nottingham Trent University, Clifton Lane, Nottingham, NG11 8NS, United Kingdom; E-mail: lee.martin@ntu.ac.uk

<sup>b</sup> Graduate School of Material Science, University of Hyogo, Kamigori-cho, Ako-gun, Hyogo, 678-1297, Japan

<sup>c</sup> Department of Chemistry, Graduate School of Science, Osaka University, 1-1 Machikaneyama-cho, Toyonaka, Osaka 560-0043, Japan

Table S1. Torsion angles for the donor cation side chains in *RR-1* / °, e.s.d.s in range 0.8-1.2°.

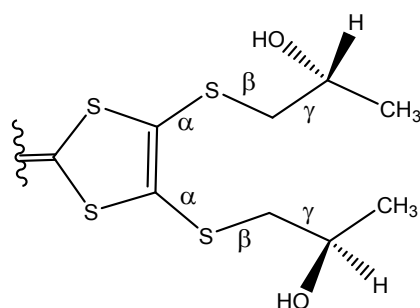

|             | Torsion $\alpha$ | Torsion $\beta$ | Torsion $\gamma$ |
|-------------|------------------|-----------------|------------------|
| DONOR 1, O1 | -45.0            | -78.2           | -173.8           |
| O2          | 63.3             | 63.3            | 57.3             |
| DONOR 2 O3  | 39.5             | 55.6            | 55.4             |
| O4          | -72.3            | -72.7           | -165.8           |
| DONOR 3 O5  | -33.9            | -90.5           | 81.6             |
| O6          | 119.9            | -155.7          | -51.8            |
| DONOR 4 O7  | 57.6             | 74.0            | 70.2             |
| O8          | -23.8            | -178.8          | 66.0             |
| DONOR 5 O9  | -15.1            | 177.0           | 76.6             |
| O10         | 55.2             | 75.4            | 66.4             |
| DONOR 6 O11 | 34.9             | 69.0            | 70.9             |
| O12         | -98.3            | 133.8           | 173.5            |
|             |                  |                 |                  |

Table S2. Torsion angles for the donor cation side chains in *S,S-2* / °, e.s.d.s 1-2°.

|             | Torsion $\alpha$ | Torsion $\beta$ | Torsion $\gamma$ |
|-------------|------------------|-----------------|------------------|
| DONOR 1, O1 | 40               | 64              | 172              |
| O2          | -67              | -81             | -171             |
| DONOR 2 O3  | -57              | -113            | 54               |
| O4          | 61               | 153             | -168             |

Table S3. Torsion angles for the donor cation side chains in *SS-3* donor. / °, e.s.d.s 2-3°.

|             | Torsion $\alpha$ | Torsion $\beta$ | Torsion $\gamma$ |
|-------------|------------------|-----------------|------------------|
| DONOR 1, O1 | 58               | 57              | -173             |
| O2          | -9               | 169             | 174              |
| DONOR 2 O3  | -97              | 69              | 175              |
| O4          | 7                | 168             | 174              |

Table S4. Torsion angles for the donor cation side chains in *rac-4*. / °, e.s.d.s 0.5-0.8°, main conformation only.

|             | Torsion $\alpha$ | Torsion $\beta$ | Torsion $\gamma$ |
|-------------|------------------|-----------------|------------------|
| DONOR 1, O1 | 109.3            | -82.4           | -68.0            |
| O2          | 12.6             | -103.0          | 178.5            |

Table S5. Relative geometry of O atoms involved in hydrogen bonding for *R,R-1*, *S,S-2*, *S,S-3*, *rac-4*.

|              |                                                                                                                                                                                                                                     |                                                                                                                                                                                                                                                                                                                                                            |
|--------------|-------------------------------------------------------------------------------------------------------------------------------------------------------------------------------------------------------------------------------------|------------------------------------------------------------------------------------------------------------------------------------------------------------------------------------------------------------------------------------------------------------------------------------------------------------------------------------------------------------|
| <i>R,R-1</i> | O(8)-H(8)⋯O(3)-H(3)(x-1, y, z)⋯O(6)-H(6)(x-1, y-1, z)⋯O(9)-H(9)(x, y-1, z)<br><br>O(11)-H(11)⋯O(2)-H(2)(x-1, y, z+1)⋯O(5)-H(5)(x, y, z+1)⋯O(4)-H(4)(x-1, y+1, z+1)<br><br>O(10)-H(10)⋯O(7)-H(7)(x, y+1, z)⋯O(12)-H(12)(x+1, y+1, z) | O(8)⋯O(3): 2.594(16)<br>O(3)⋯O(6): 2.781(10)<br>O(6)⋯O(9): 2.742(18)<br>O(8)⋯O(3)⋯O(6): 98.6(5)°<br>O(3)⋯O(6)⋯O(9): 125.4(3)°<br><br>O(11)⋯O(2): 2.940(13)<br>O(2)⋯O(5): 2.832(16)<br>O(5)⋯O(4): 2.914(13)<br>O(11)⋯O(2)⋯O(5): 104.1(4)°<br>O(2)⋯O(5)⋯O(4): 106.9(4)°<br><br>O(10)⋯O(7): 2.777(13)<br>O(7)⋯O(12): 2.703(15)<br>O(10)⋯O(7)⋯O(12): 117.1(4)° |
| <i>S,S-2</i> | O(3)-H(3)⋯O(4)-H(4)(x+1, y, z)⋯O(1)-H(1)(x+1, y+1, z-1)⋯O(2)-H(2)(x+1, y+1, z-1)                                                                                                                                                    | O(3)⋯O(4): 2.890(14)<br>O(4)⋯O(1): 2.652(14)<br>O(1)⋯O(2): 2.619(14)<br>O(3)⋯O(4)⋯O(1): 94.2(5)°<br>O(4)⋯O(1)⋯O(2): 114.1(5)°                                                                                                                                                                                                                              |
| <i>S,S-3</i> | O(3)-H(3)⋯O(2)(x, y, z+1)<br>O(4)-H(4)⋯O(3)(x, y-1, z)                                                                                                                                                                              | O(3)⋯O(2): 3.01(3)<br>O(4)⋯O(3): 2.85(3)<br>O(2)⋯O(3)⋯O(4): 121.3(9)                                                                                                                                                                                                                                                                                       |
| <i>rac-4</i> | O(1)-H(1)⋯O(2)(-x-1, -y, -z)                                                                                                                                                                                                        | O(1)⋯O(2): 2.751(10)                                                                                                                                                                                                                                                                                                                                       |

Fig S1a Hydrogen bonding in *R,R*-1

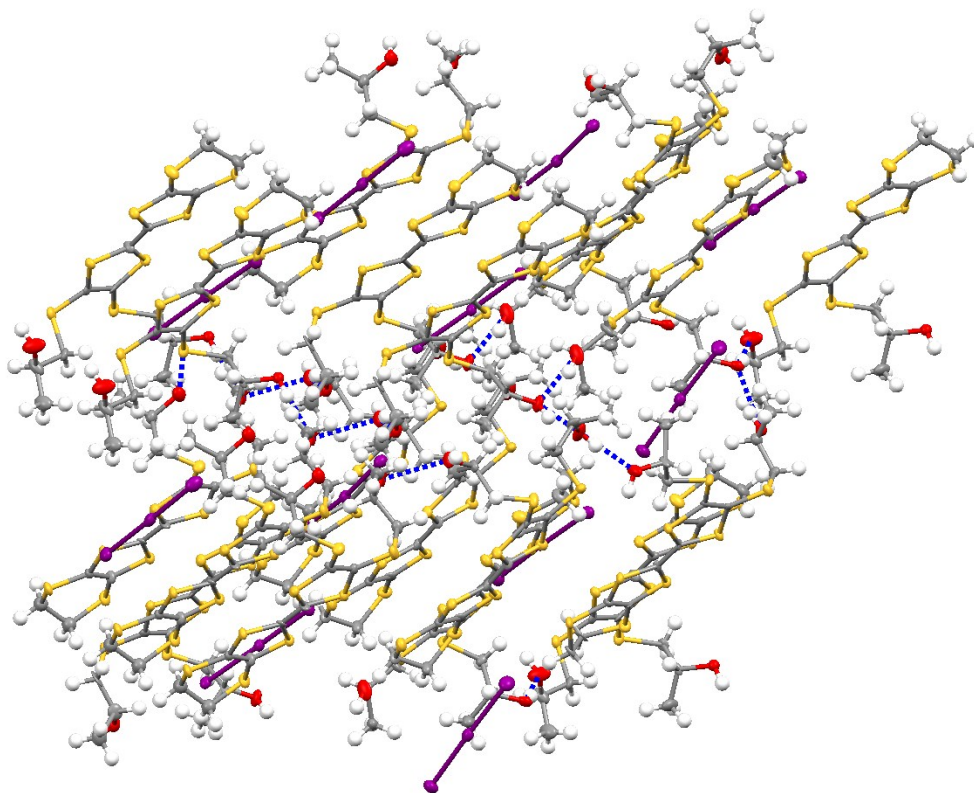

Fig S1b Hydrogen bonding in *R,R*-1

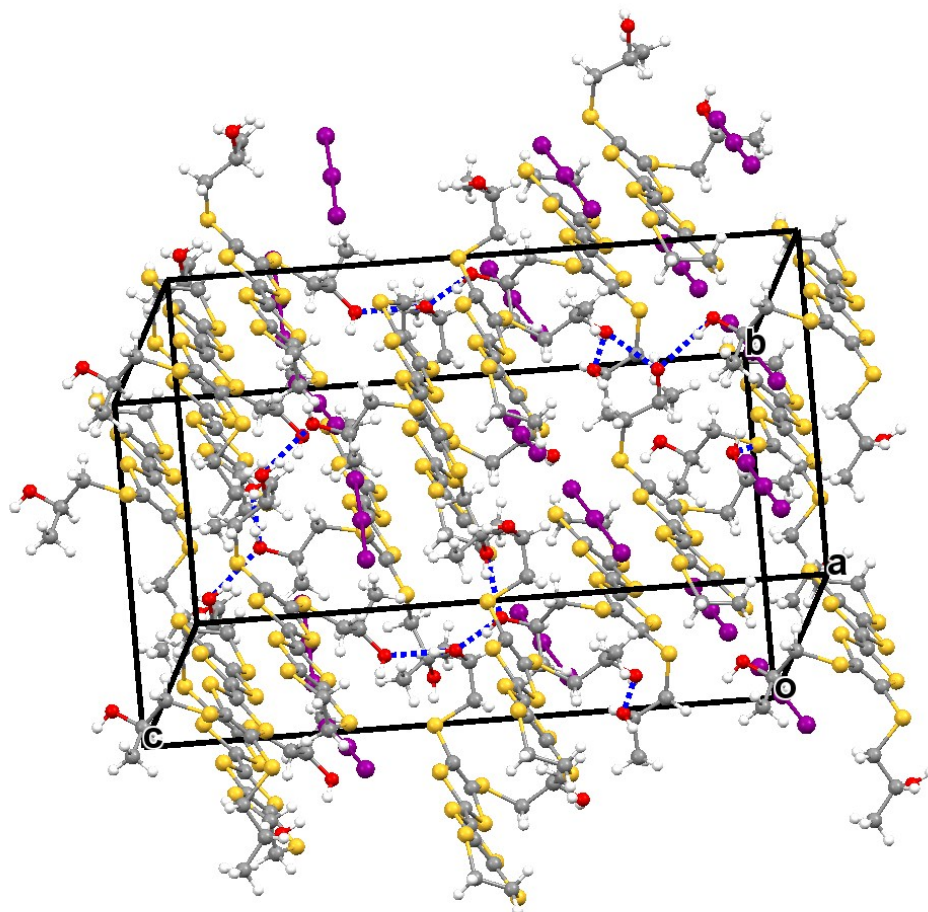

Fig S1c Hydrogen bonding in *R,R*-1

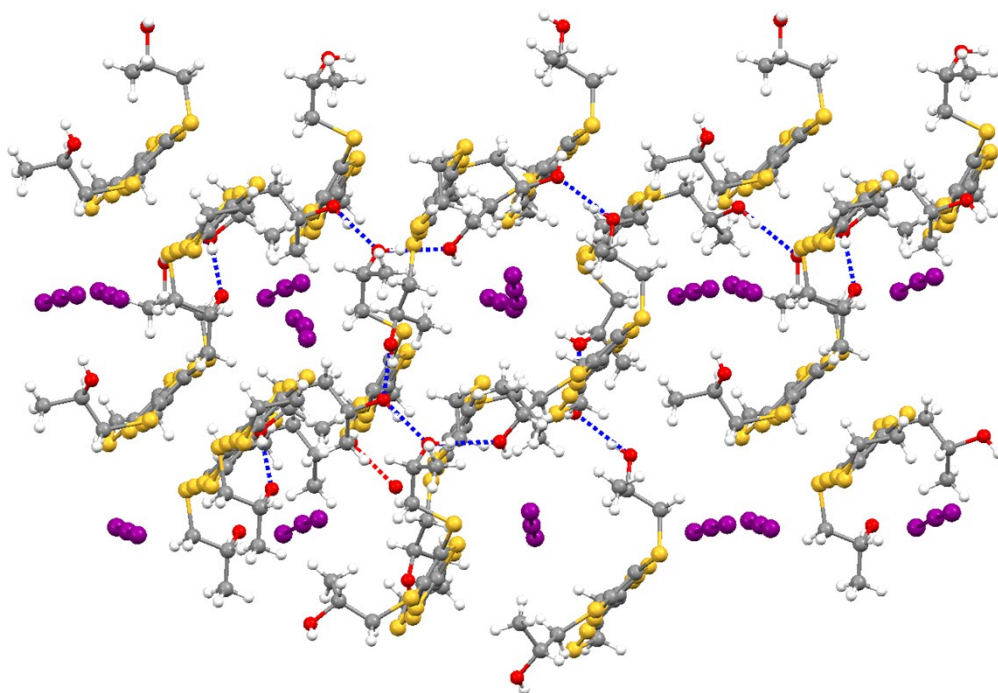

Fig S1d Hydrogen bonding in *R,R*-1

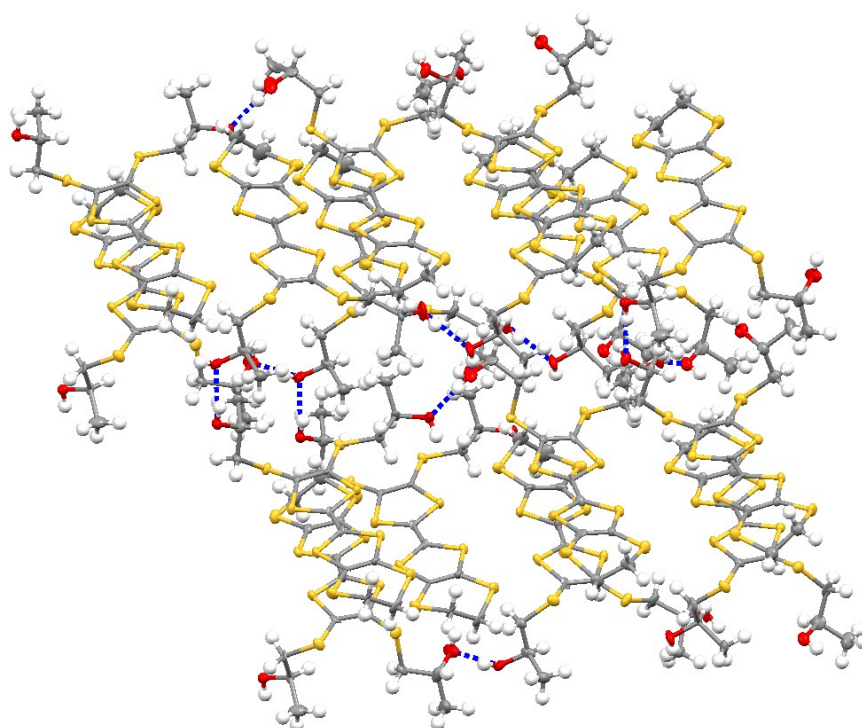

Fig S2. Hydrogen bonding in *rac-4*

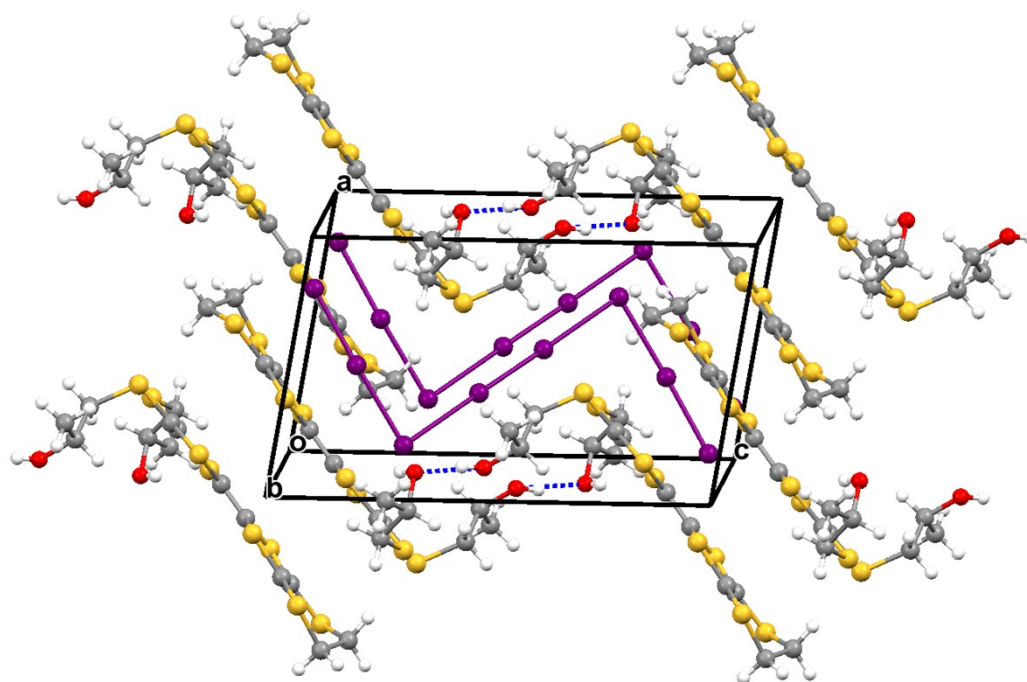

Fig S3a. Asymmetric unit of **S,S-1**.

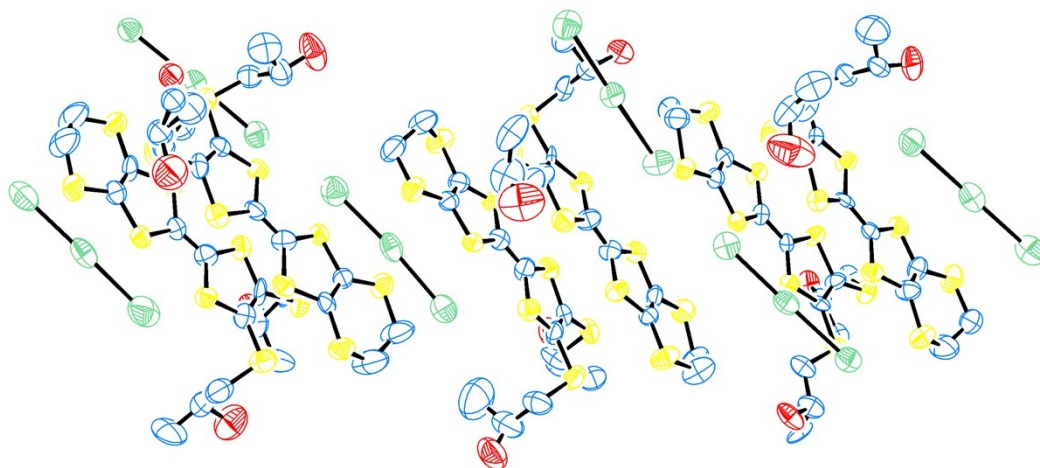



Fig S3b. Asymmetric unit of **S,S-2**.

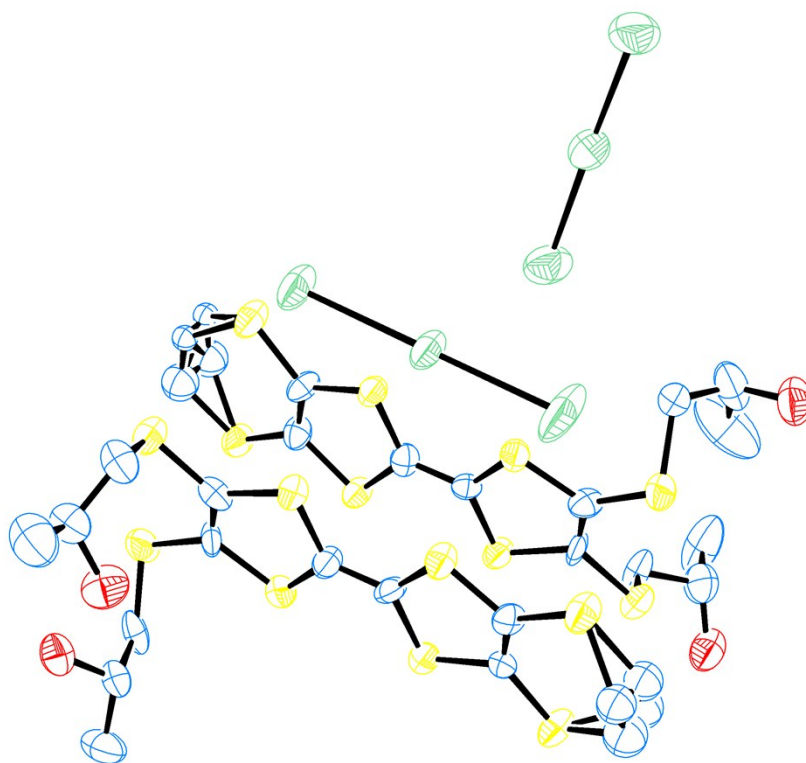

Fig S3c. Asymmetric unit of **S,S-3**; two parts of two different octaiodide dianions are shown in the asymmetric unit.

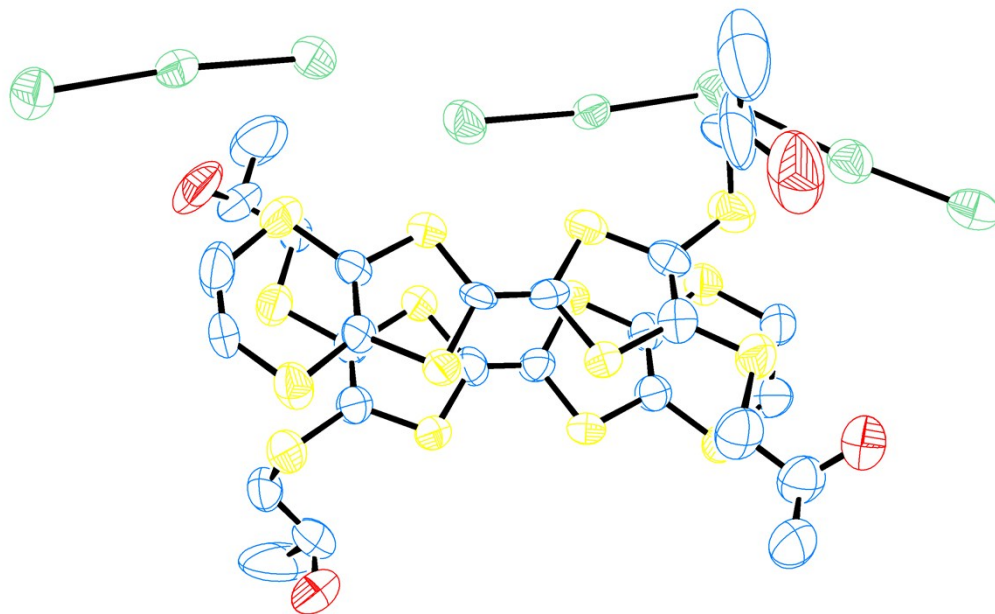

Fig S3d. Asymmetric unit of **rac-4**; the octaiodide dianion sits on a centre of symmetry so only half is crystallographically unique.

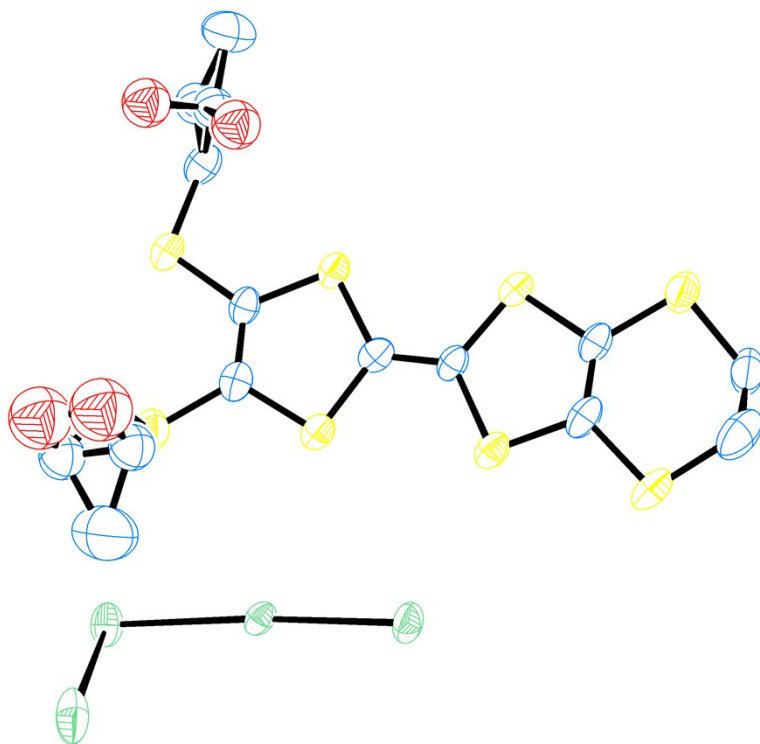

Supplement: c6dt04645b1.pdf [file c6dt04645b1.pdf]
